# Supplementary material for: Combinatorial effector targeting (COMET) for transcriptional modulation and locus-specific biochemistry
Source: PubMed Central journal article supplement — bioRxiv. 2024 Oct 28:2024.10.28.620517. Preprint. [Version 1] doi: 10.1101/2024.10.28.620517 (PMC11565746; doi:10.1101/2024.10.28.620517), 2024-10-28

**A**Top 20 most frequent N domains  
(Log2FC > 1)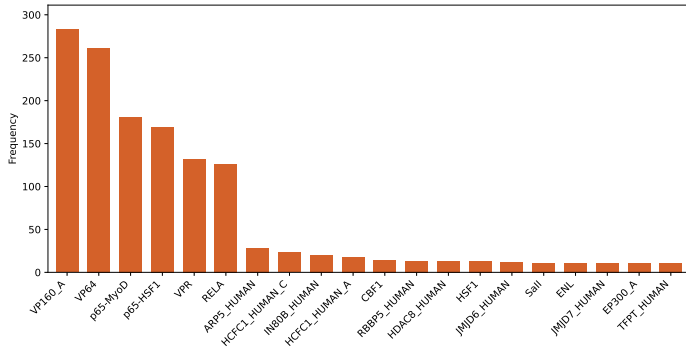Top 20 most frequent C domains  
(Log2FC > 1)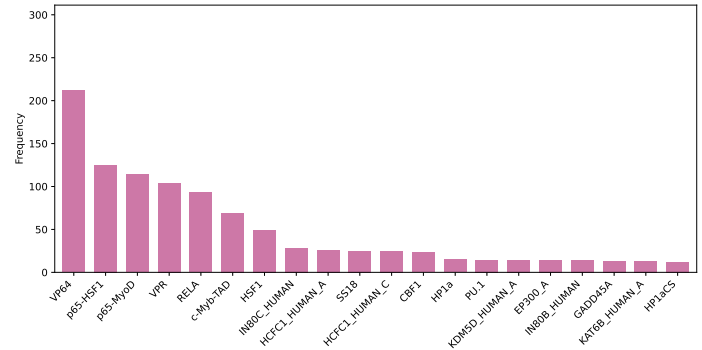Top 20 most frequent N domains  
(Log2FC < -1)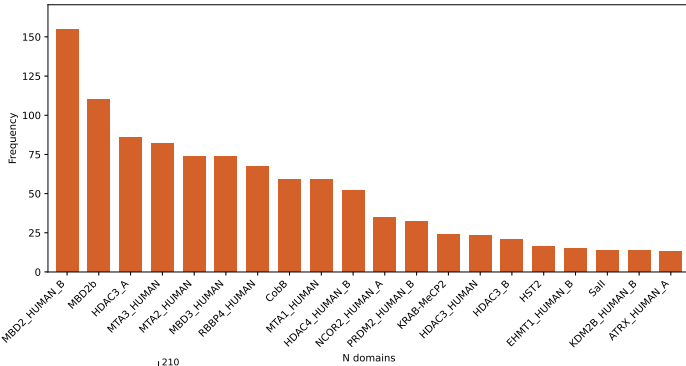Top 20 most frequent C domains  
(Log2FC < -1)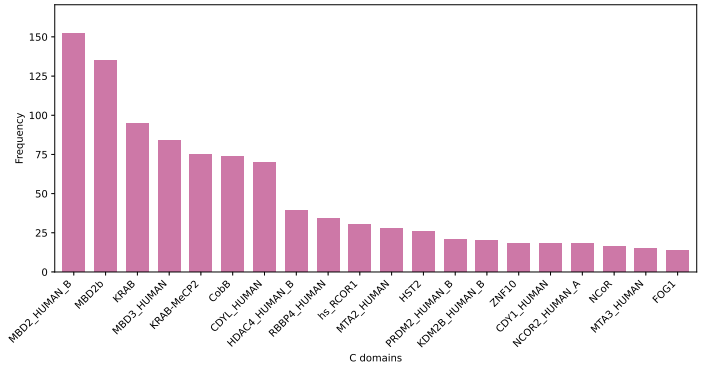**B**

Repressors: Log2FC &lt; 1

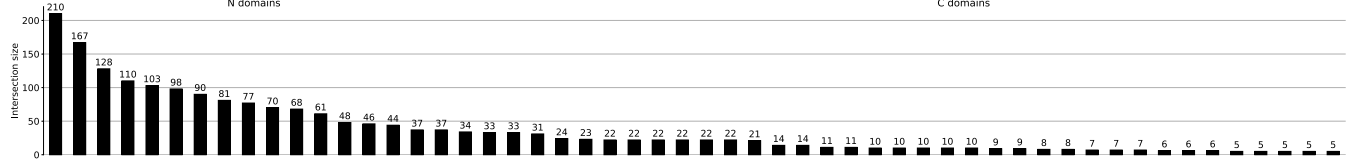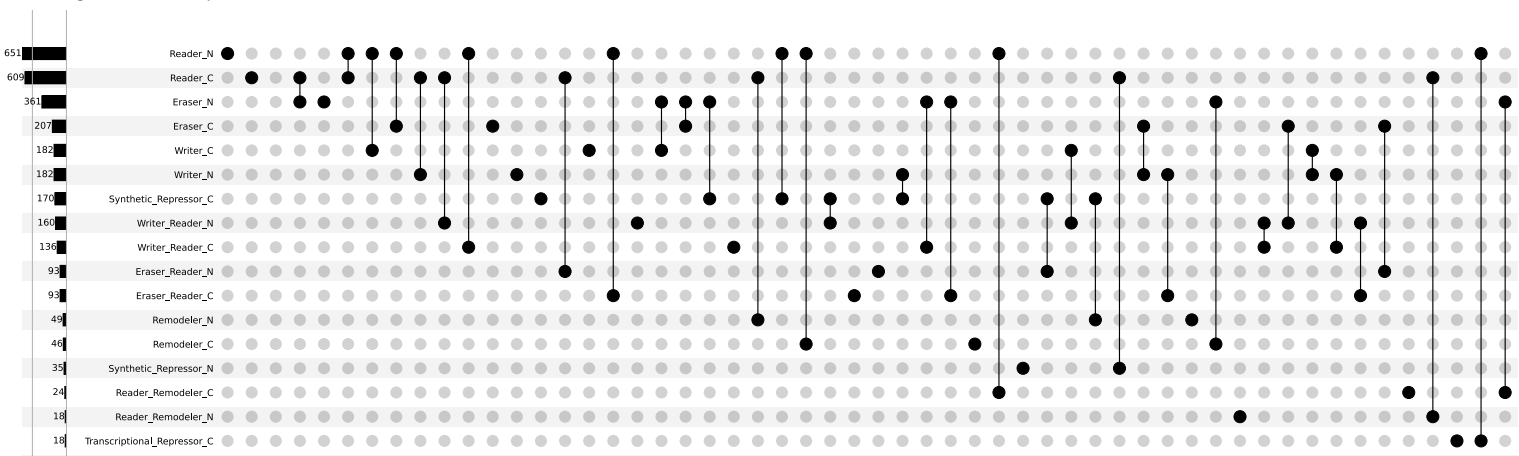**C**

Activators: Log2FC &gt; 1

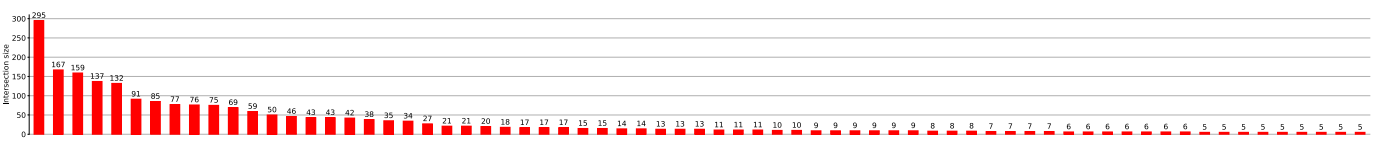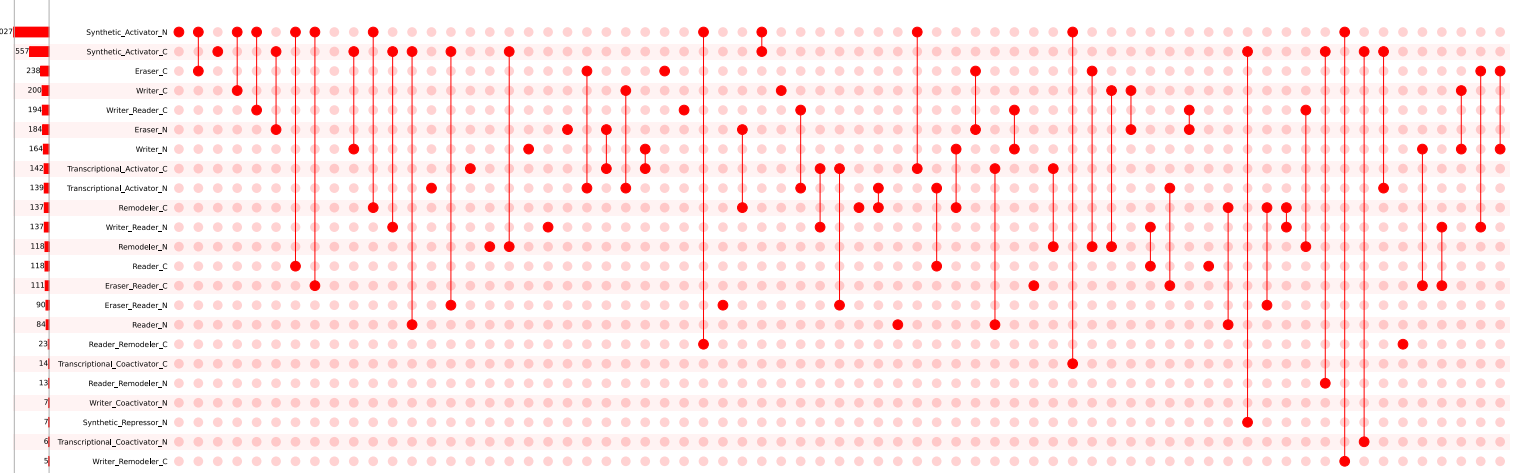

Supplement: media-4.pdf [file media-4.pdf]
