# Supplementary material for: Combinatorial effector targeting (COMET) for transcriptional modulation and locus-specific biochemistry
Source: PubMed Central journal article supplement — bioRxiv. 2024 Oct 28:2024.10.28.620517. Preprint. [Version 1] doi: 10.1101/2024.10.28.620517 (PMC11565746; doi:10.1101/2024.10.28.620517), 2024-10-28

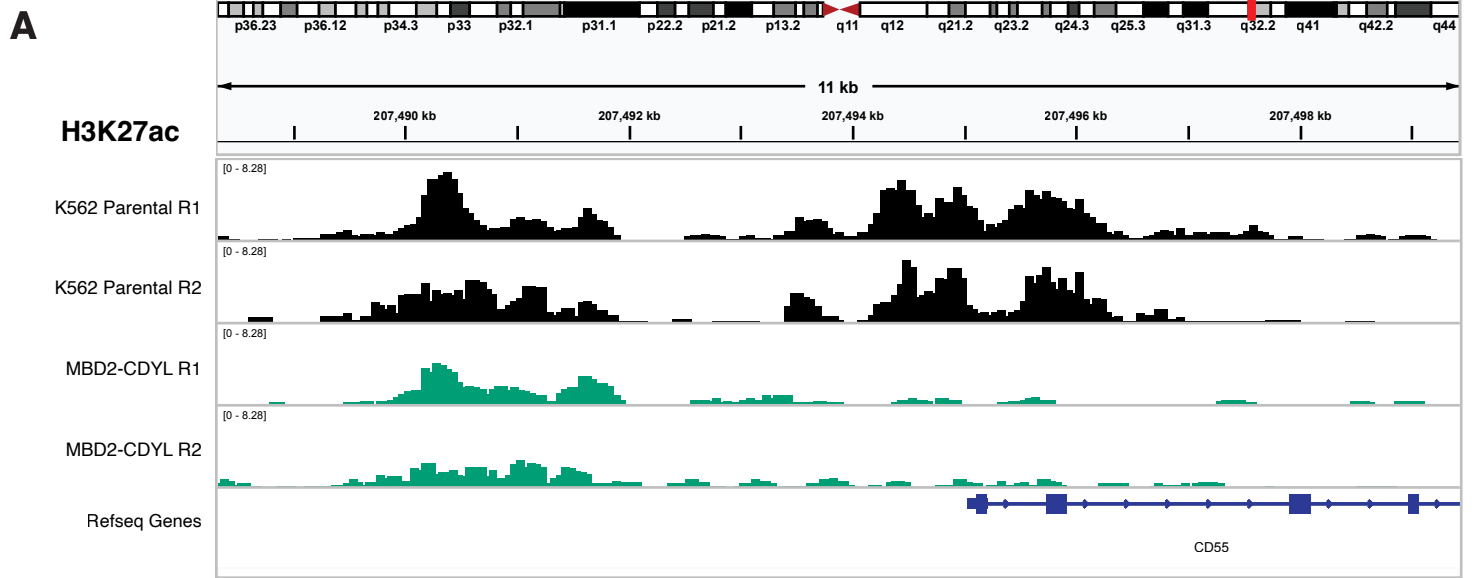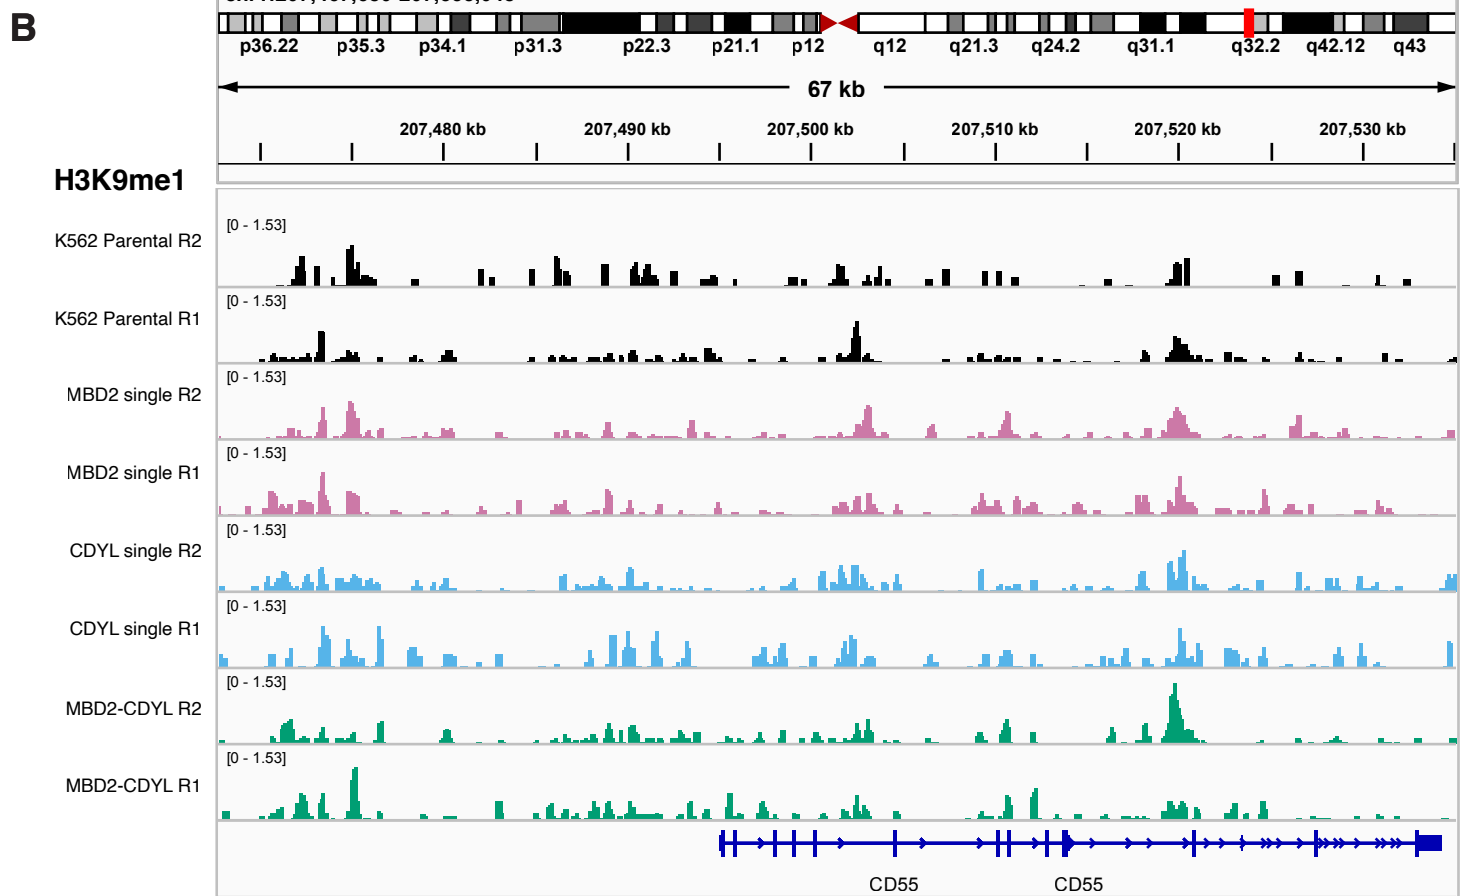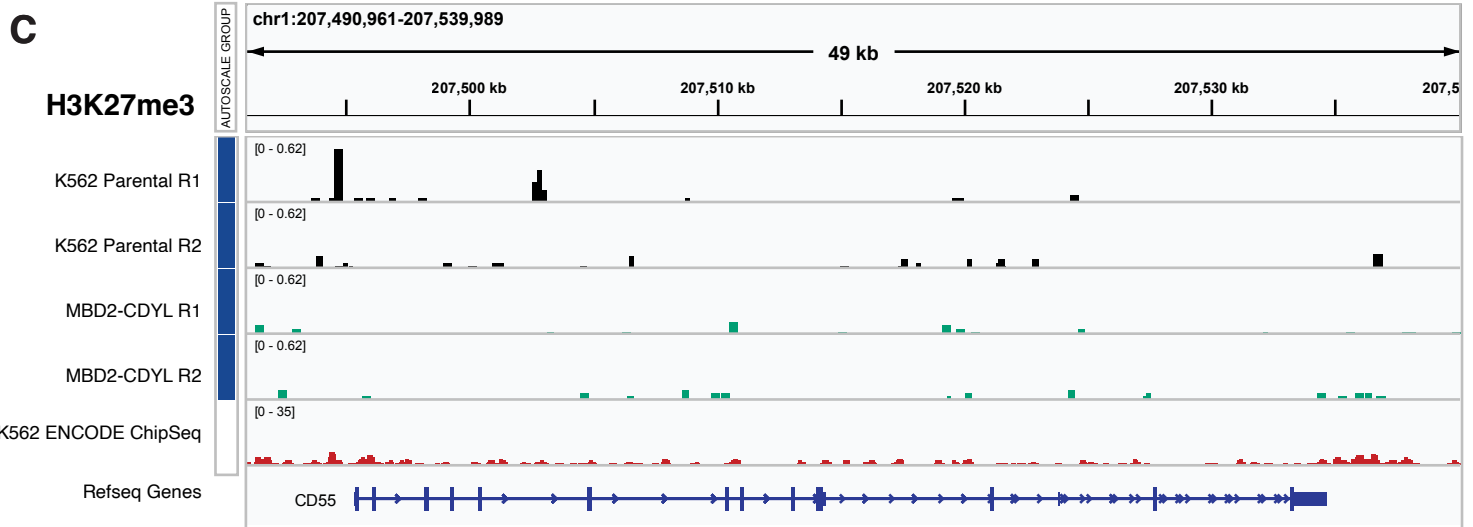

Supplement: media-6.pdf [file media-6.pdf]
