# Supplementary material for: Combinatorial effector targeting (COMET) for transcriptional modulation and locus-specific biochemistry
Source: PubMed Central journal article supplement — bioRxiv. 2024 Oct 28:2024.10.28.620517. Preprint. [Version 1] doi: 10.1101/2024.10.28.620517 (PMC11565746; doi:10.1101/2024.10.28.620517), 2024-10-28
Supplement: NIHPP2024.10.28.620517v1-supplement-10.pdf [file NIHPP2024.10.28.620517v1-supplement-10.pdf]

Table S4. L1 K562 screen raw counts per condition.

Table S5. L2 K562 screen raw counts per condition.

Table S6. CUT&Tag sample information and link to deposited fastq.gz files.

Table S7. L1 iPSC screen raw counts per condition.

Table S8. Barcoded PCR primer sequences
